# Supplementary material
Source: PubMed Central journal article supplement (PMC3288512)
Supplement: NIHMS355208-supplement-1_si_001.pdf [file NIHMS355208-supplement-1_si_001.pdf]

Supporting information  
for:

### Mixed-Valence Nickel-Iron Dithiolates Related to the [NiFe]-Hydrogenases

David Schilter, Mark J. Nilges, Mrinmoy Chakrabarti, Paul A. Lindahl, Thomas B. Rauchfuss, Matthias Stein

<sup>a</sup>Department of Chemistry, University of Illinois, 600 S. Goodwin Ave.  
Urbana, IL 61801

<sup>b</sup>Department of Chemistry, Texas A&M University,  
College Station, TX 77842-3012

<sup>c</sup>Max Planck Institute for Dynamics of Complex Technical Systems, Sandtorstraße 1,  
39106 Magdeburg, Germany

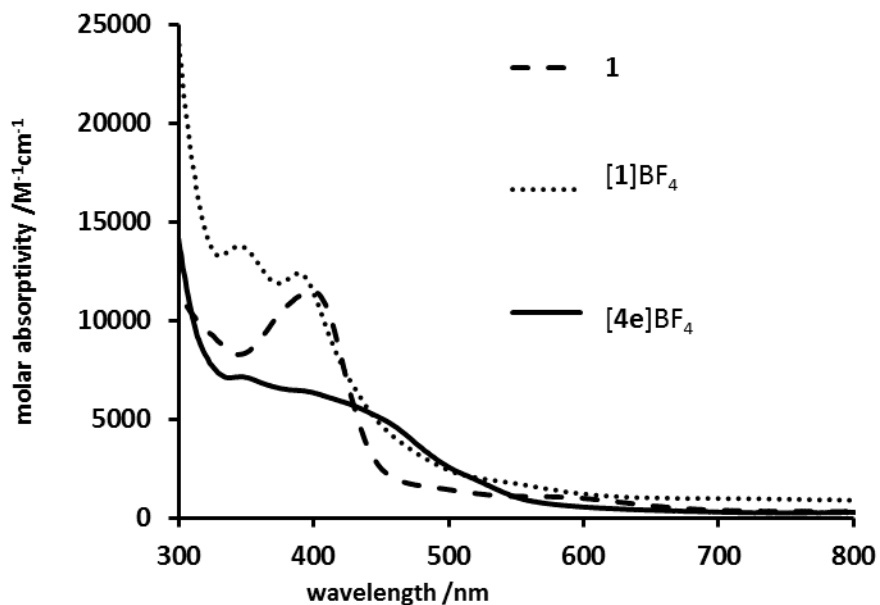

Figure S1: UV-vis spectra of 1, [1]BF<sub>4</sub> and [4e]BF<sub>4</sub> (0.5 mM in CH<sub>2</sub>Cl<sub>2</sub>).

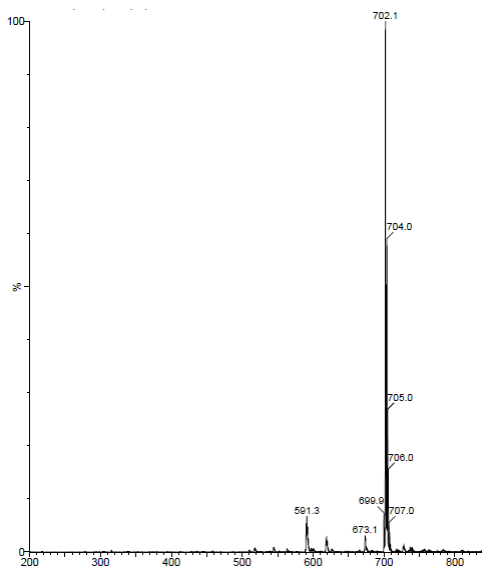

**Figure S2:** Positive ion ESI mass spectrum of [1]BF<sub>4</sub>.

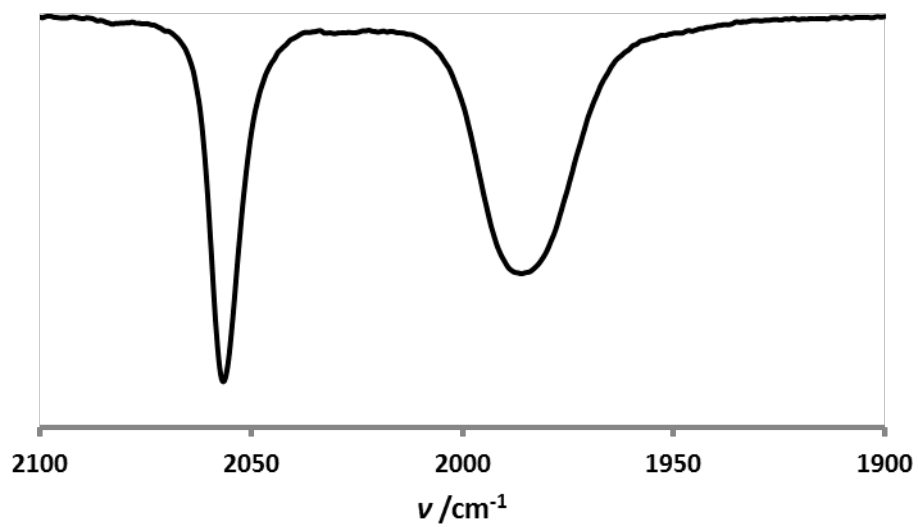

**Figure S3:** FT-IR spectrum ( $\nu_{\text{CO}}$  region, CH<sub>2</sub>Cl<sub>2</sub>) of [1]BF<sub>4</sub>.

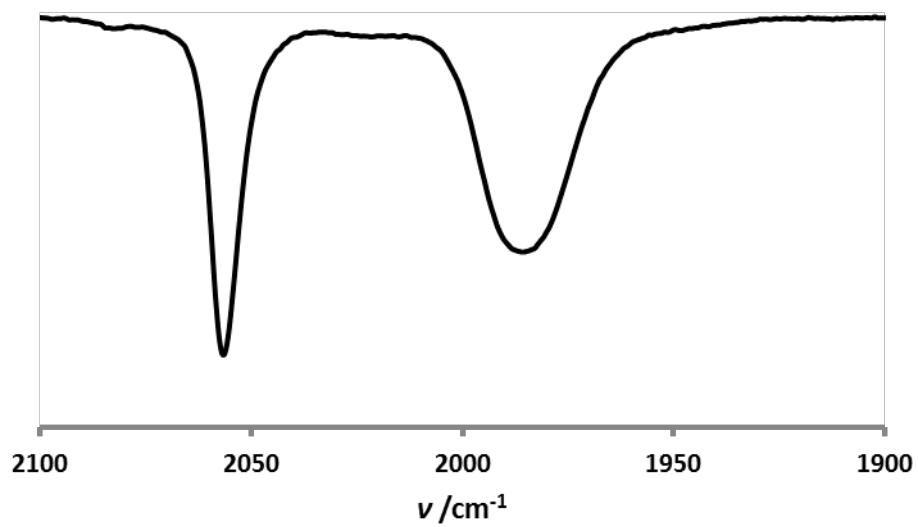

**Figure S4:** FT-IR spectrum ( $\nu_{\text{CO}}$  region,  $\text{CH}_2\text{Cl}_2$ ) of  $[\mathbf{1}]\text{PF}_6$ .

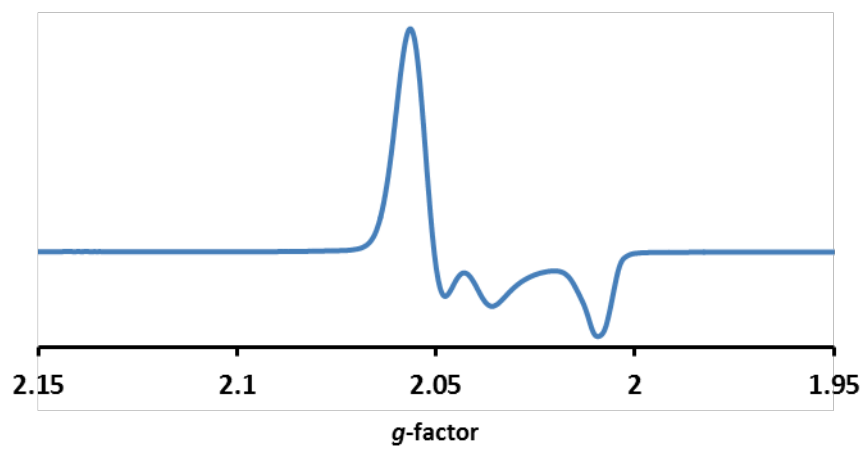

**Figure S5:** X-band EPR spectrum ( $\text{CH}_2\text{Cl}_2/\text{PhMe}$ , 110 K) of  $[\mathbf{1}]\text{PF}_6$ .

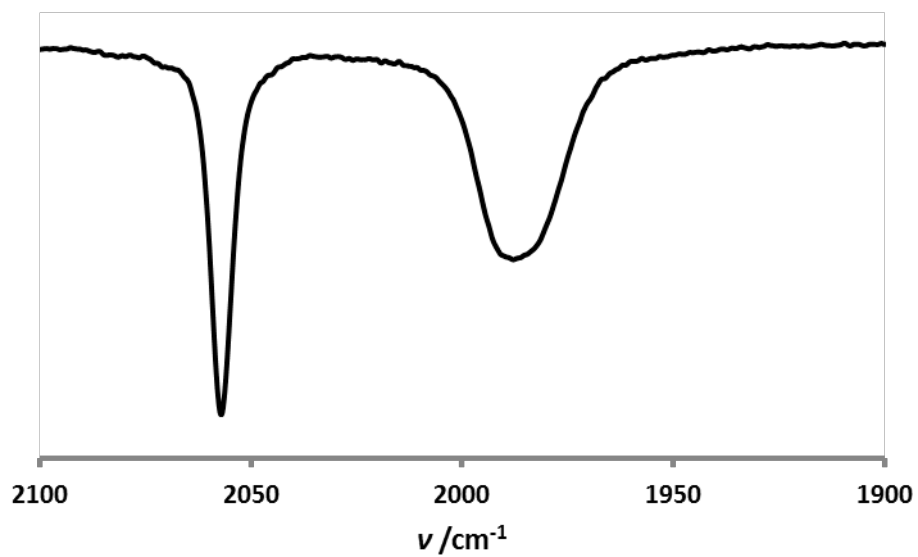

**Figure S6:** FT-IR spectrum ( $\nu_{\text{CO}}$  region,  $\text{CH}_2\text{Cl}_2$ ) of  $[\mathbf{1}]\text{BArF}_4$ .

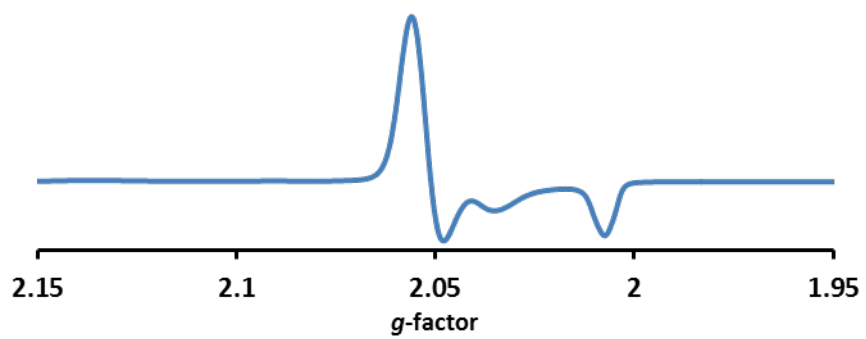

**Figure S7:** X-band EPR spectrum ( $\text{CH}_2\text{Cl}_2/\text{PhMe}$ , 110 K) of  $[\mathbf{1}]\text{BArF}_4$ .

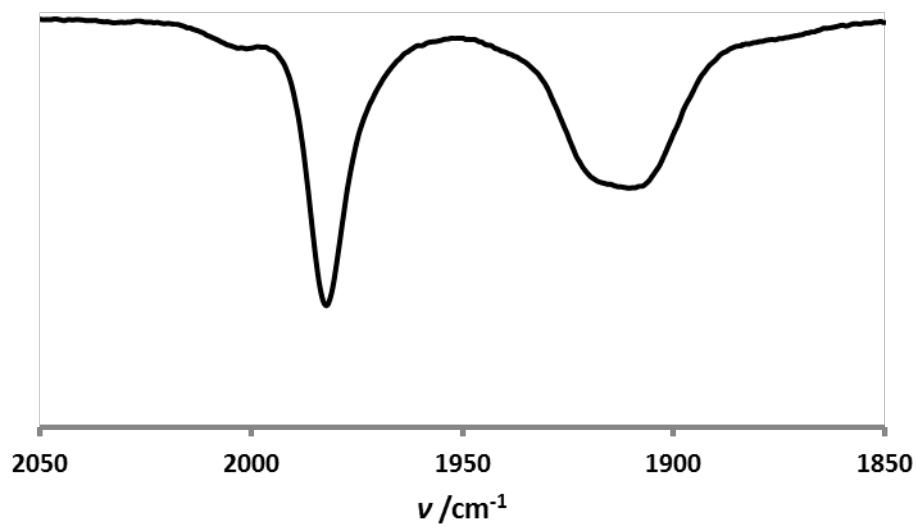

**Figure S8:** FT-IR spectrum ( $\nu_{\text{CO}}$  region,  $\text{CH}_2\text{Cl}_2$ ) of [1'].

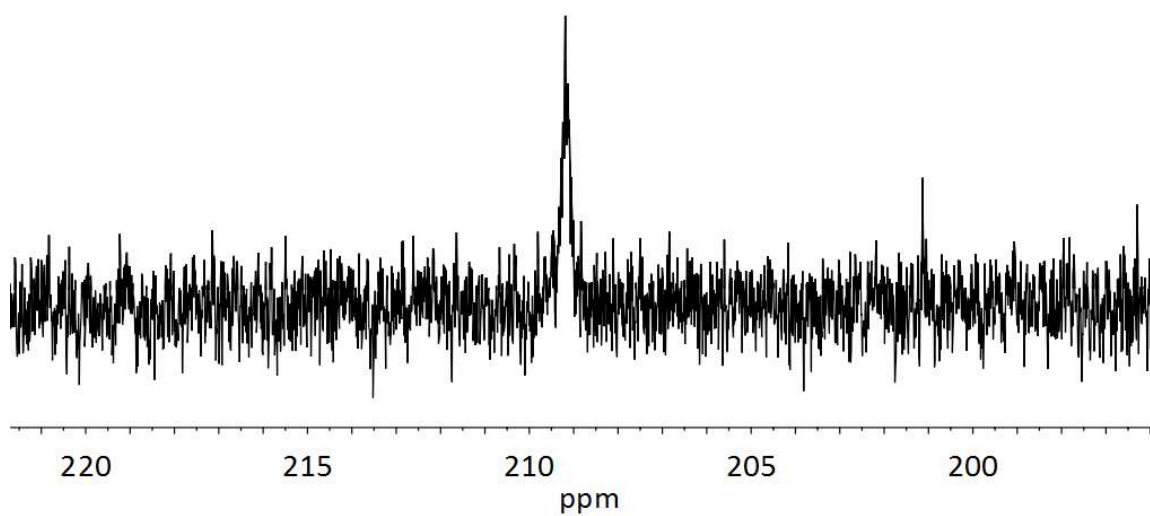

**Figure S9:**  $^{13}\text{C}\{^1\text{H}\}$  NMR spectrum ( $\text{CD}_2\text{Cl}_2$ , 202 MHz) of [1'].

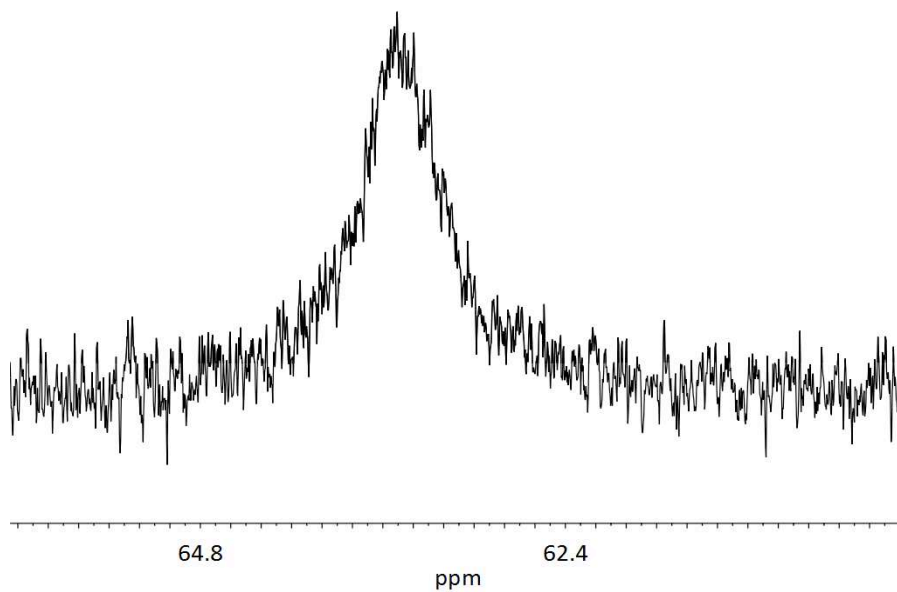

**Figure S10:**  $^{31}\text{P}\{^1\text{H}\}$  NMR spectrum ( $\text{CD}_2\text{Cl}_2$ , 202 MHz) of [1].

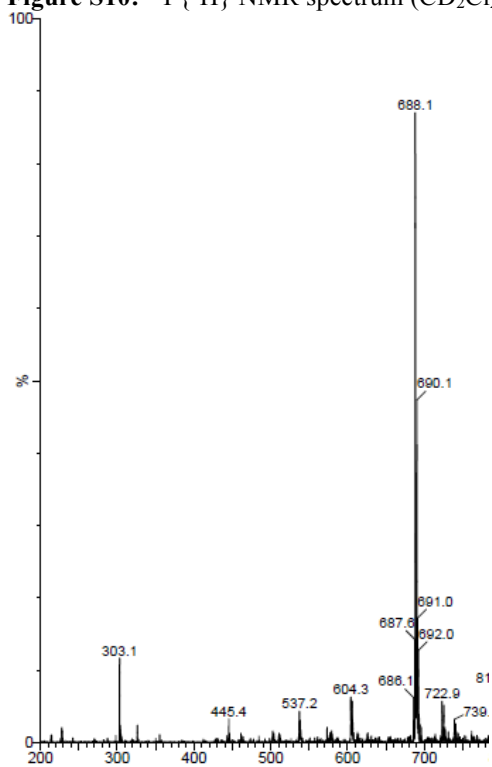

**Figure S11:** Positive ion ESI mass spectrum of  $[\mathbf{2}]\text{BF}_4$ .

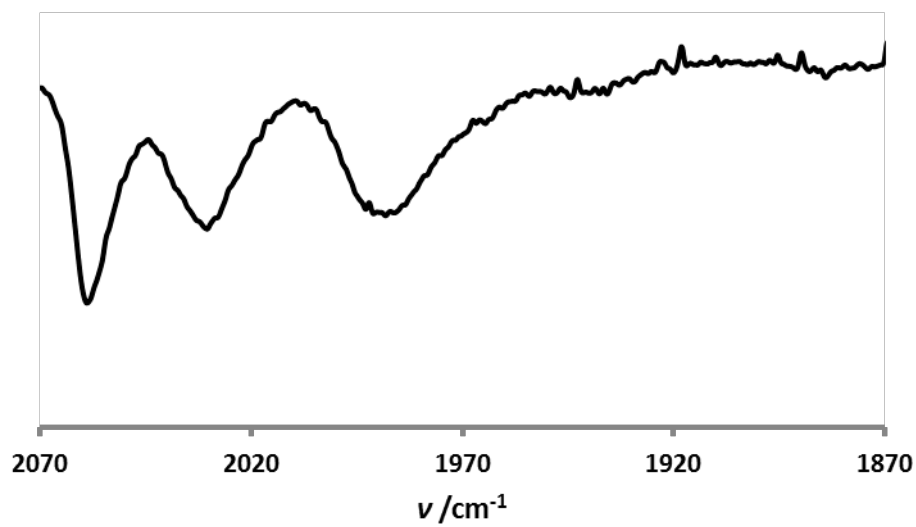

**Figure S12:** FT-IR spectrum ( $\nu_{\text{CO}}$  region,  $\text{CH}_2\text{Cl}_2$ ) of  $[\mathbf{2}]\text{BF}_4$ .

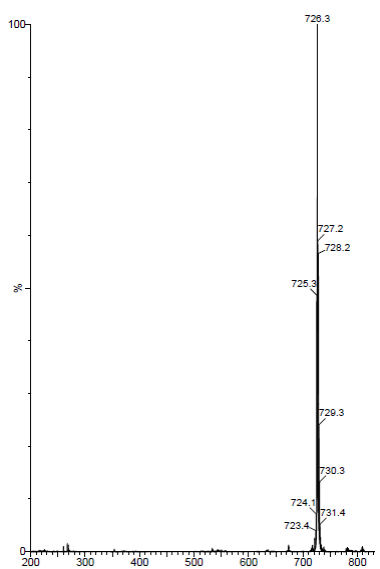

**Figure S13:** Positive ion ESI mass spectrum of  $[\mathbf{3}]\text{BF}_4$ .

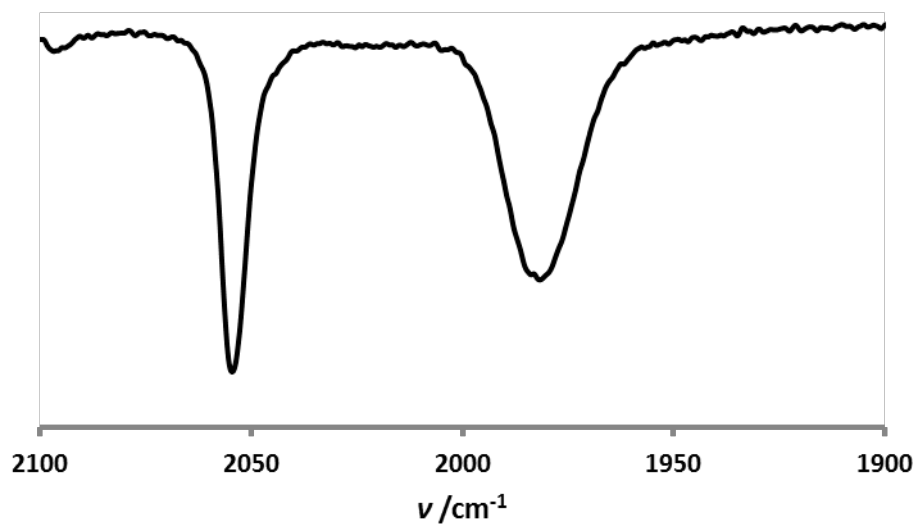

**Figure S14:** FT-IR spectrum ( $\nu_{\text{CO}}$  region,  $\text{CH}_2\text{Cl}_2$ ) of  $[\mathbf{3}]\text{BF}_4$ .

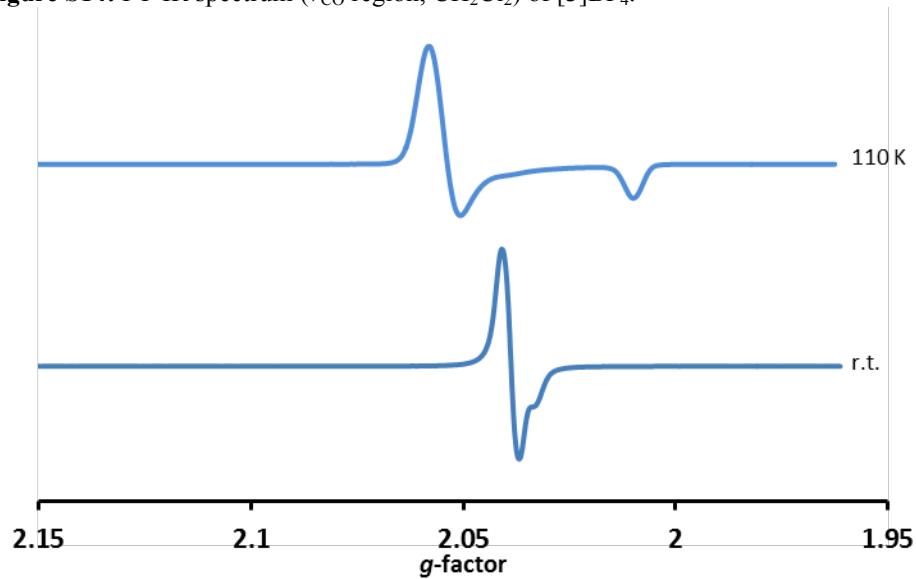

**Figure S15:** X-band EPR spectra ( $\text{CH}_2\text{Cl}_2/\text{PhMe}$ ) of  $[\mathbf{3}]\text{BF}_4$  at 110 K and room temperature.



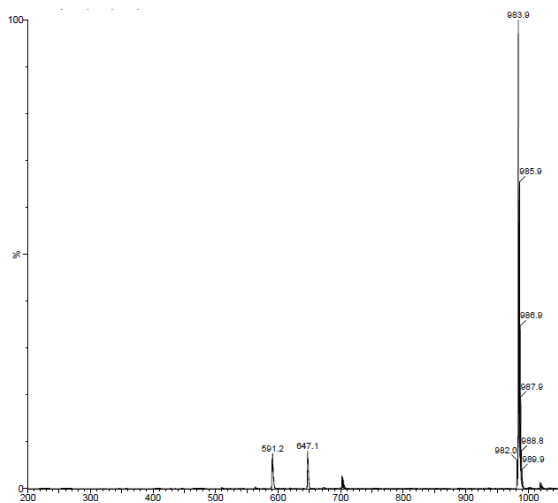

Figure S16: Positive ion ESI mass spectrum of [4a]BF<sub>4</sub>.

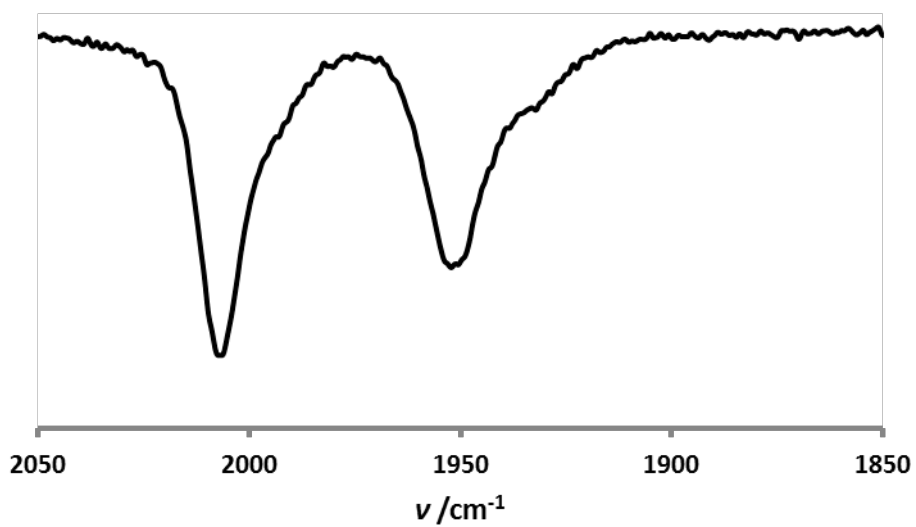

Figure S17: FT-IR spectrum ( $\nu_{\text{CO}}$  region, CH<sub>2</sub>Cl<sub>2</sub>) of [4a]BF<sub>4</sub>.

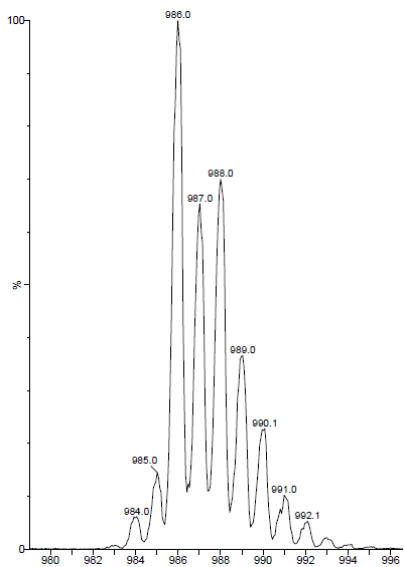

Figure S18: Positive ion ESI mass spectrum of [4a']BF<sub>4</sub>.

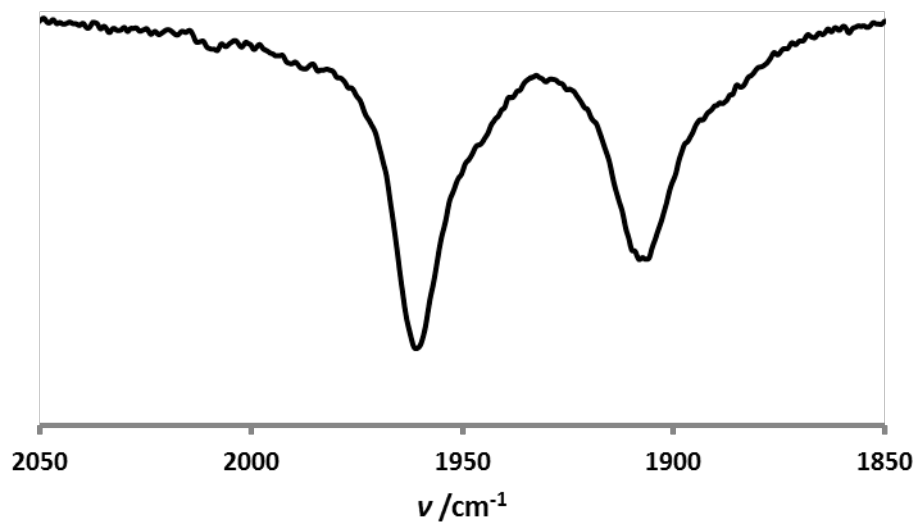

Figure S19: FT-IR spectrum ( $\nu_{\text{CO}}$  region, CH<sub>2</sub>Cl<sub>2</sub>) of [4a']BF<sub>4</sub>.

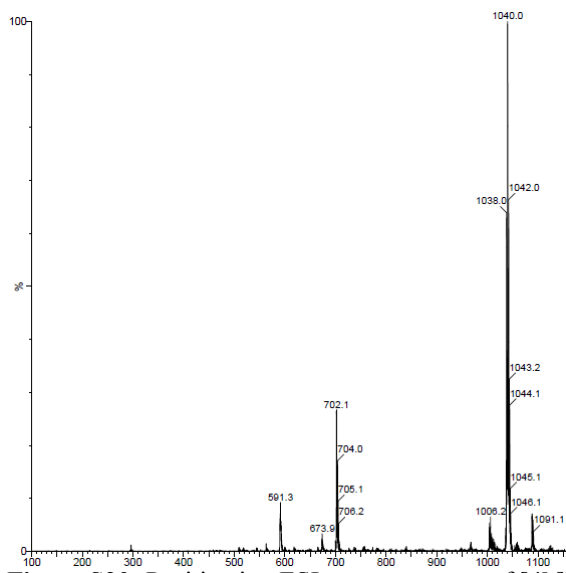

Figure S20: Positive ion ESI mass spectrum of [4b]BF<sub>4</sub>.

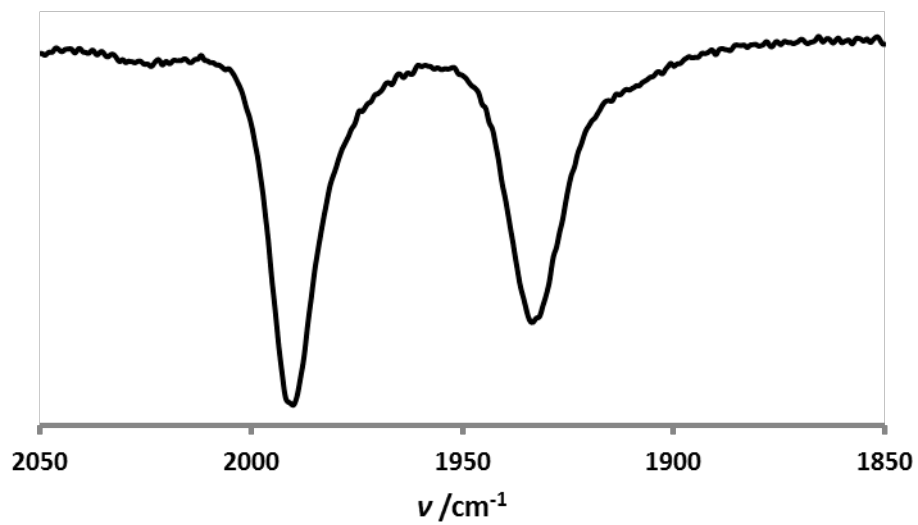

Figure S21: FT-IR spectrum ( $\nu_{\text{CO}}$  region, CH<sub>2</sub>Cl<sub>2</sub>) of [4b]BF<sub>4</sub>.

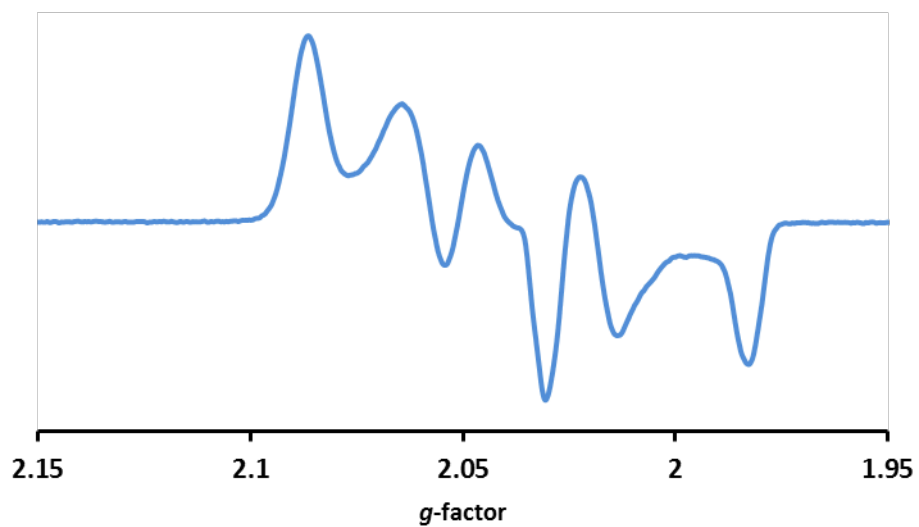

**Figure S22:** X-band EPR spectrum ( $\text{CH}_2\text{Cl}_2/\text{PhMe}$ , 110 K) of  $[\mathbf{4b}]\text{BF}_4$ .

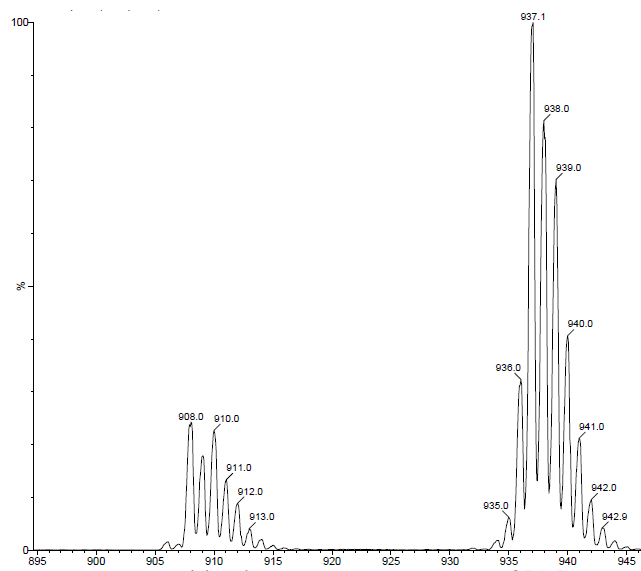

**Figure S23:** Positive ion ESI mass spectrum of  $[\mathbf{4c}]\text{BF}_4$ .

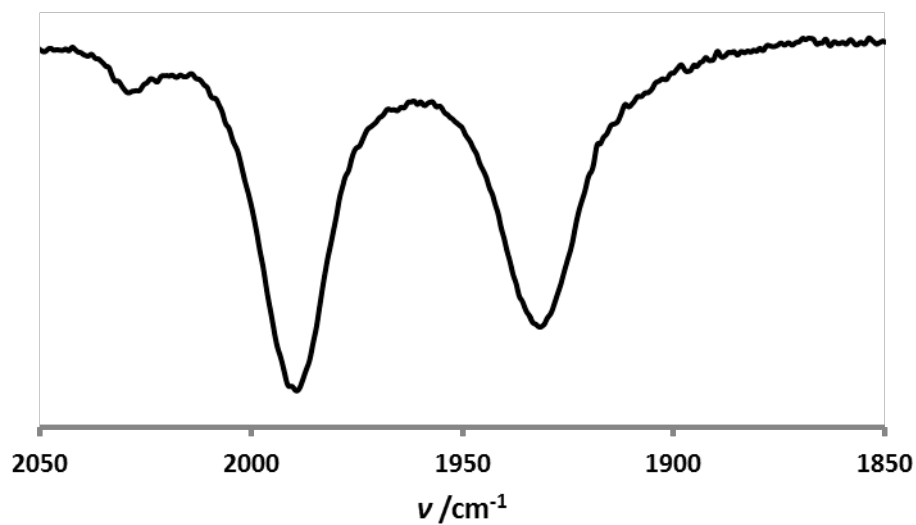

**Figure S24:** FT-IR spectrum ( $\nu_{\text{CO}}$  region,  $\text{CH}_2\text{Cl}_2$ ) of **[4c]** $\text{BF}_4$ .

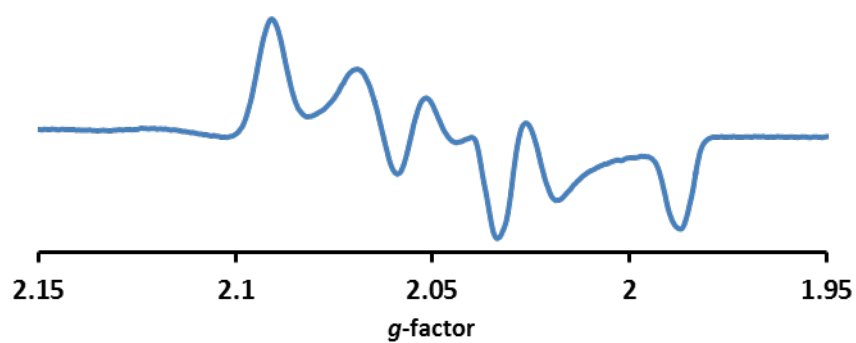

**Figure S25:** X-band EPR spectrum ( $\text{CH}_2\text{Cl}_2/\text{PhMe}$ , 110 K) of **[4c]** $\text{BF}_4$ .

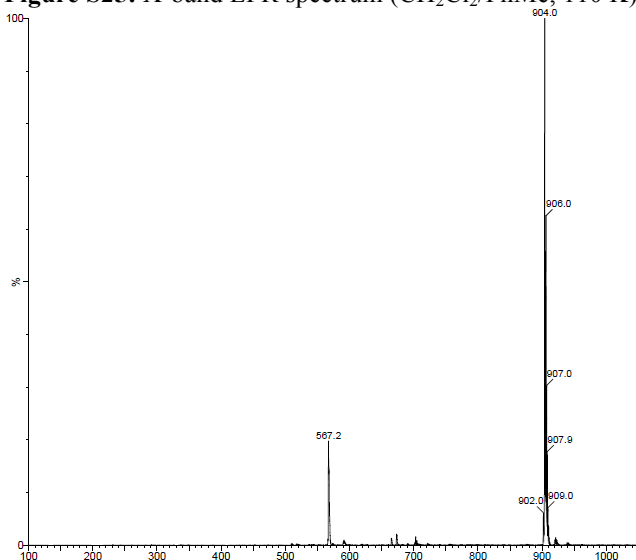

**Figure S26:** Positive ion ESI mass spectrum of **[4d]** $\text{BF}_4$ .

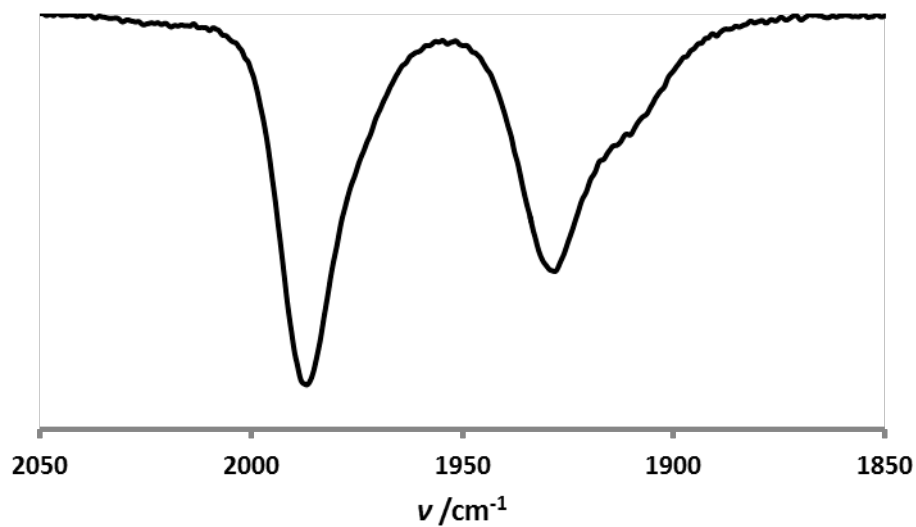

**Figure S27:** FT-IR spectrum ( $\nu_{\text{CO}}$  region,  $\text{CH}_2\text{Cl}_2$ ) of  $[\mathbf{4d}]\text{BF}_4$ .

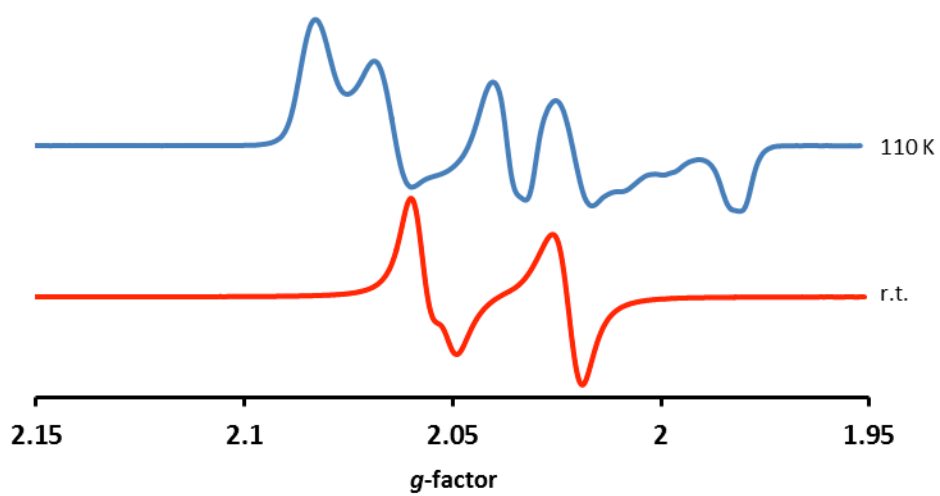

**Figure S28:** X-band EPR spectra ( $\text{CH}_2\text{Cl}_2/\text{PhMe}$ ) of  $[\mathbf{4d}]\text{BF}_4$  collected at 110 K and room temperature.

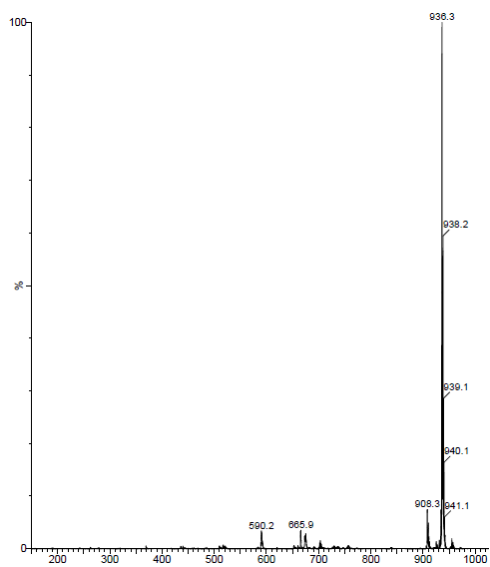

Figure S29: Positive ion ESI mass spectrum of  $[4e]BF_4$ .

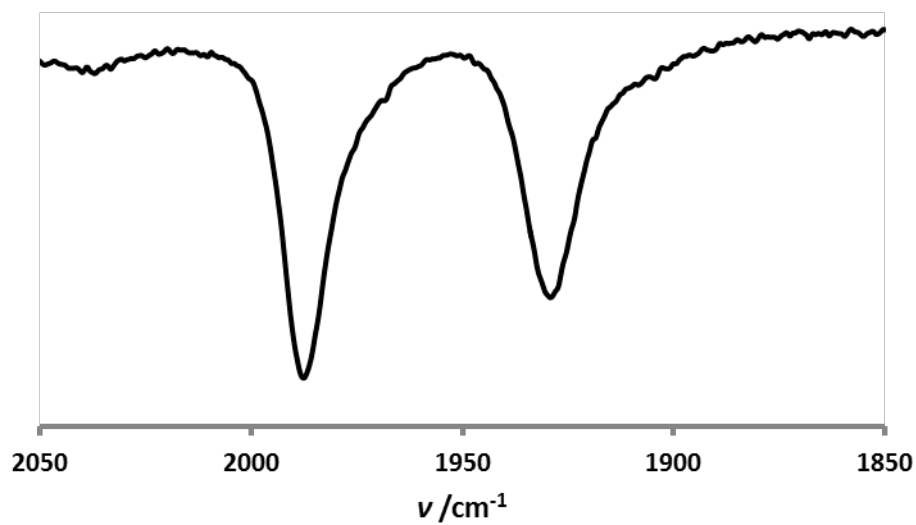

Figure S30: FT-IR spectrum ( $\nu_{CO}$  region,  $CH_2Cl_2$ ) of  $[4e]BF_4$ .

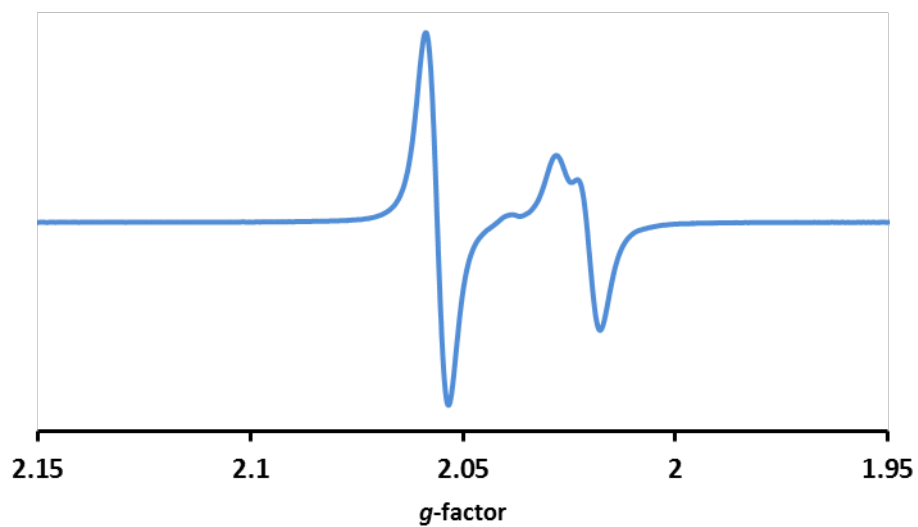

**Figure S31:** X-band EPR spectrum ( $\text{CH}_2\text{Cl}_2/\text{PhMe}$ , rt) of  $[\mathbf{4e}]\text{BF}_4$ .

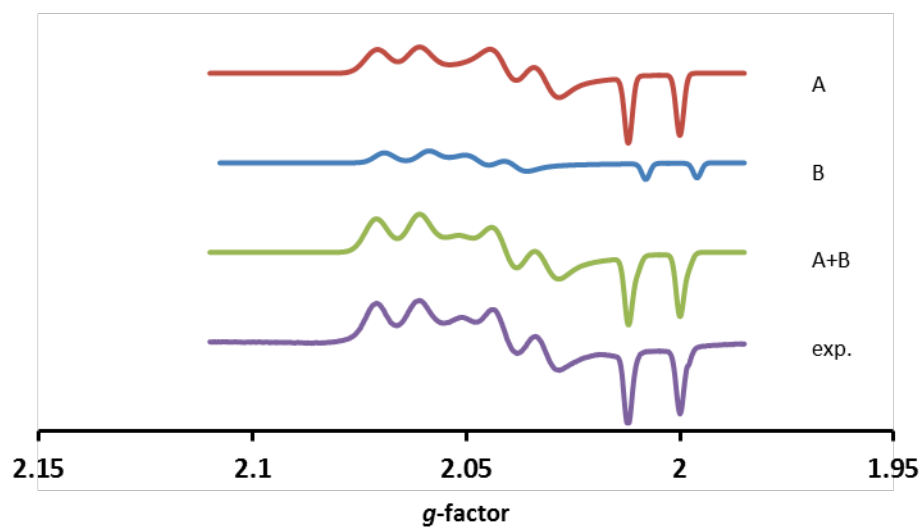

**Figure S32:** Q-band EPR spectra ( $\text{CH}_2\text{Cl}_2/\text{PhMe}$ , 130 K) of  $[\mathbf{4e}]\text{BF}_4$ . The experimental spectrum could be simulated as a sum of two components, denoted A and B.



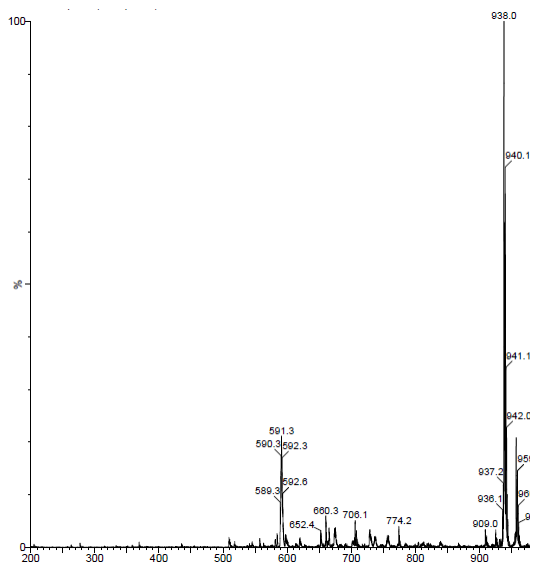

Figure S33: Positive ion ESI mass spectrum of  $[4e']BF_4$ .

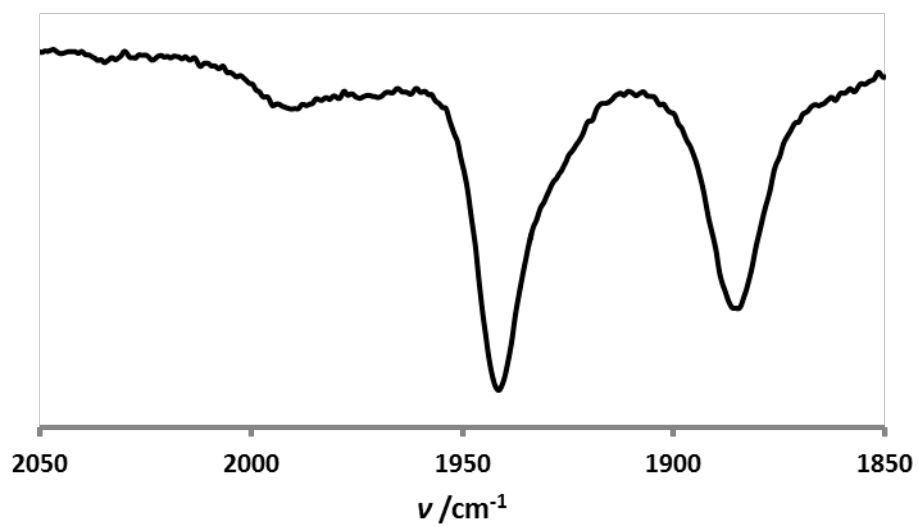

Figure S34: FT-IR spectrum ( $\nu_{CO}$  region,  $CH_2Cl_2$ ) of  $[4e']BF_4$ .

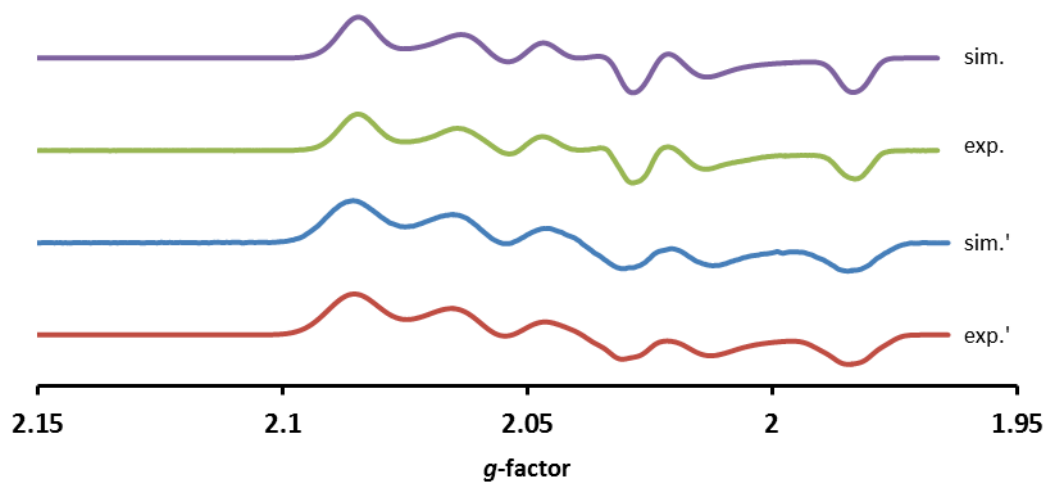

**Figure S35:** X-band EPR spectrum ( $\text{CH}_2\text{Cl}_2/\text{PhMe}$ , 110 K) of  $[\mathbf{4e}]\text{BF}_4$  (exp.) and  $[\mathbf{4e}']\text{BF}_4$  (exp.), along with their simulated spectra (sim. and sim.', respectively).

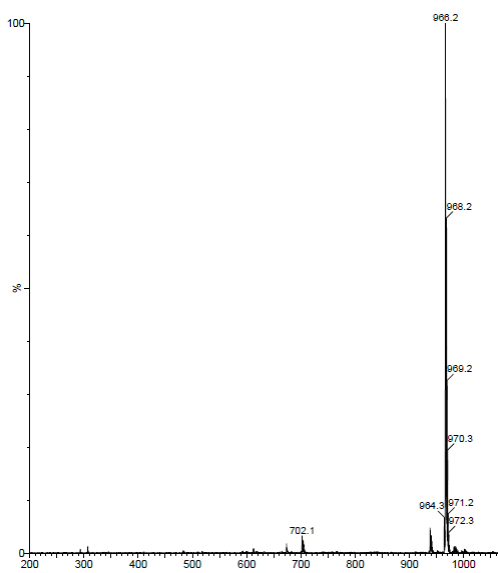

**Figure S36:** Positive ion ESI mass spectrum of  $[\mathbf{4f}]\text{BF}_4$ .

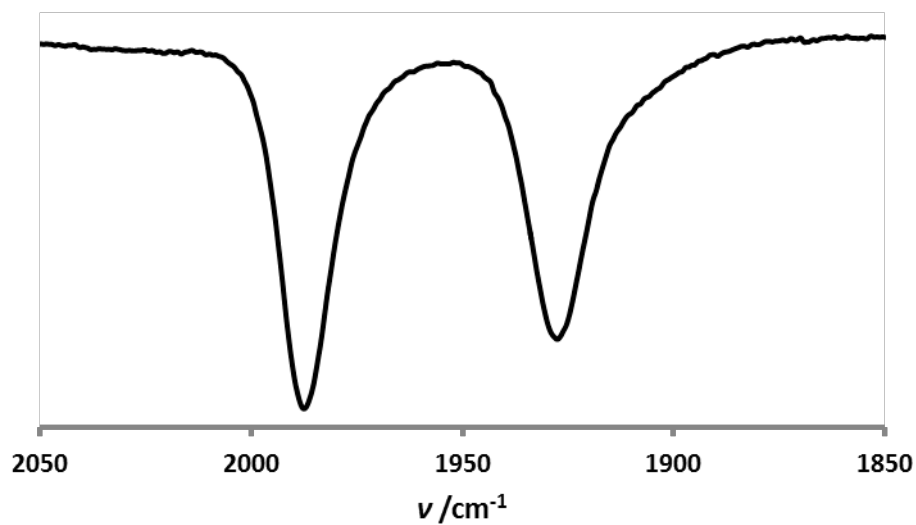

**Figure S37:** FT-IR spectrum ( $\nu_{\text{CO}}$  region,  $\text{CH}_2\text{Cl}_2$ ) of  $[\mathbf{4f}]\text{BF}_4$ .

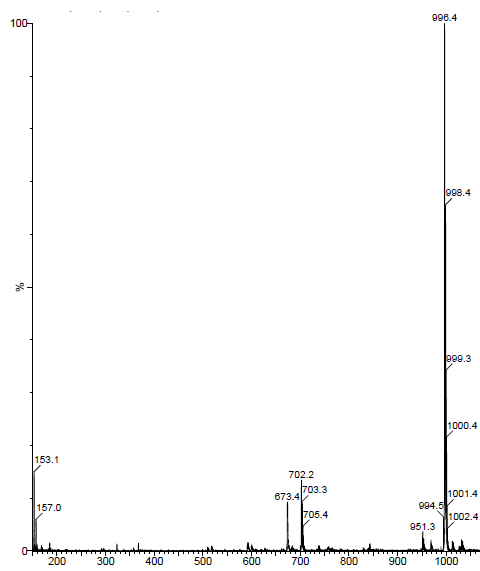

**Figure S38:** Positive ion ESI mass spectrum of  $[\mathbf{4g}]\text{BF}_4$ .

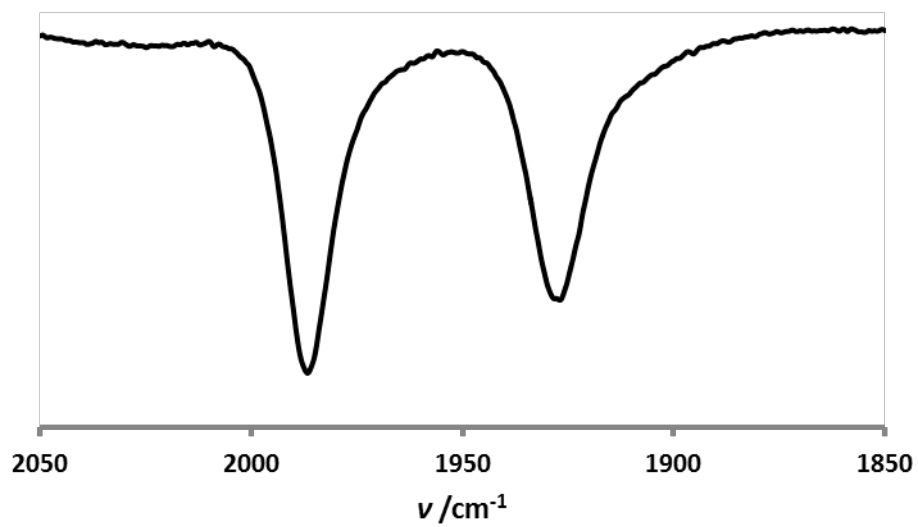

**Figure S39:** FT-IR spectrum ( $\nu_{\text{CO}}$  region,  $\text{CH}_2\text{Cl}_2$ ) of  $[\mathbf{4g}]\text{BF}_4$ .

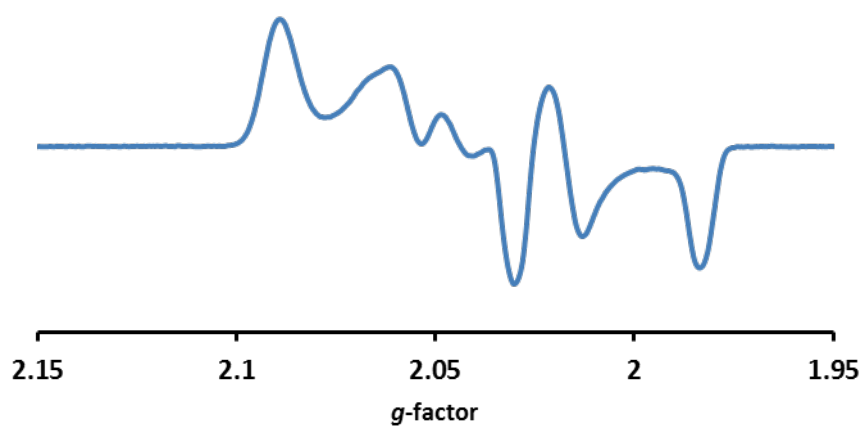

**Figure S40:** X-band EPR spectrum ( $\text{CH}_2\text{Cl}_2/\text{PhMe}$ , 110 K) of  $[\mathbf{4g}]\text{BF}_4$ .

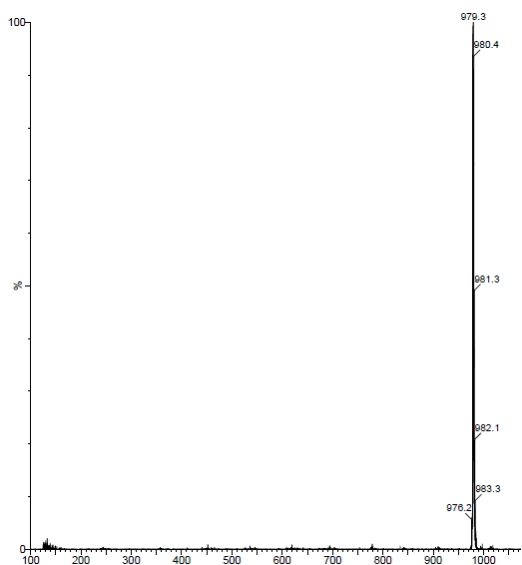

Figure S41: Positive ion ESI mass spectrum of [4h]BF<sub>4</sub>.

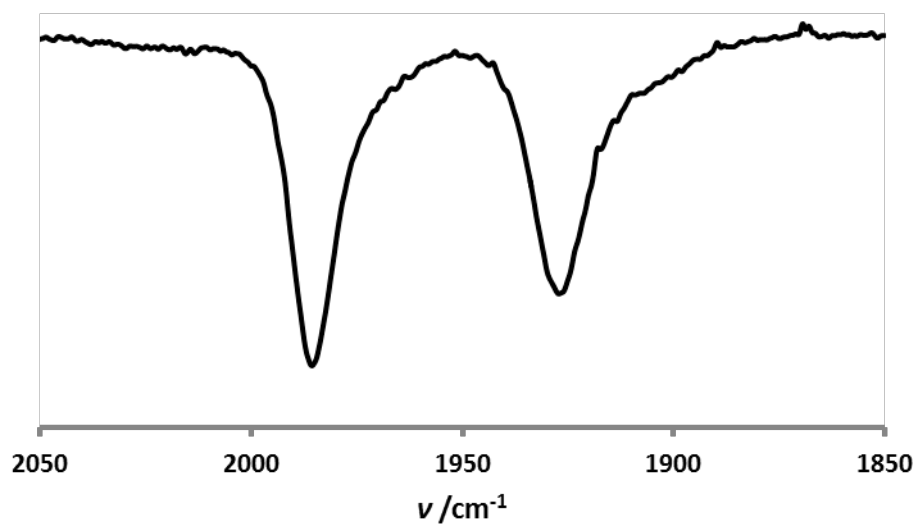

Figure S42: FT-IR spectrum ( $\nu_{\text{CO}}$  region, CH<sub>2</sub>Cl<sub>2</sub>) of [4h]BF<sub>4</sub>.

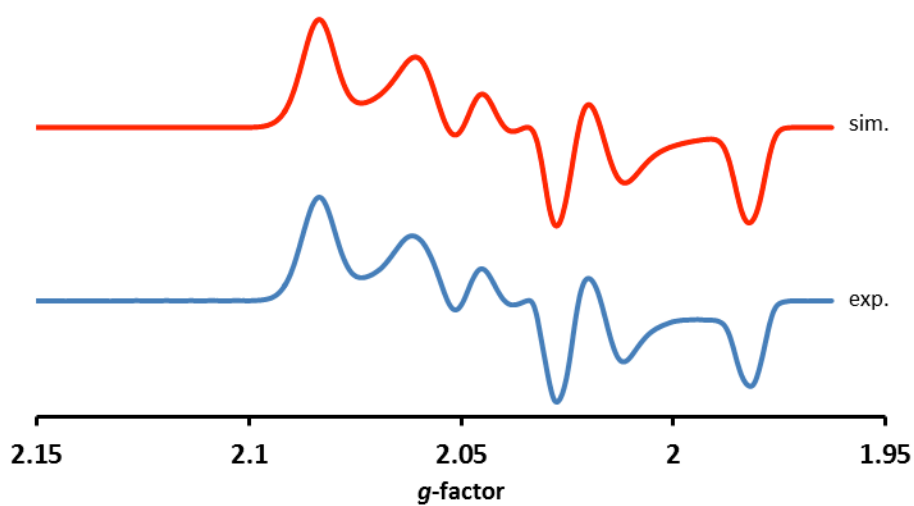

**Figure S43:** The simulated and experimental X-band EPR spectrum ( $\text{CH}_2\text{Cl}_2/\text{PhMe}$ , 110 K) of  $[\mathbf{4h}]\text{BF}_4$ .

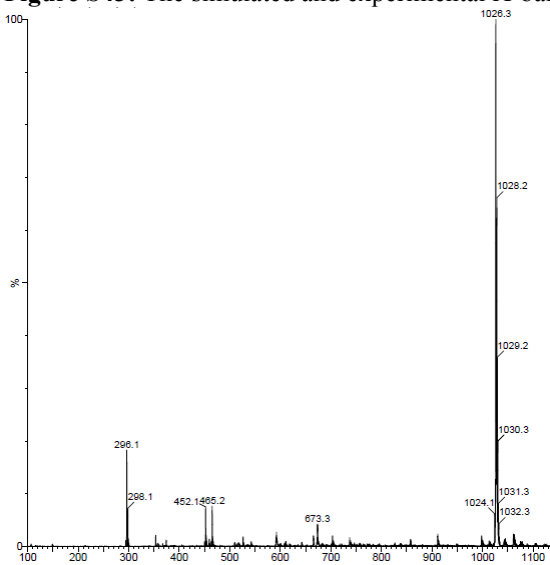

**Figure S44:** Positive ion ESI mass spectrum of  $[\mathbf{4i}]\text{BF}_4$ .

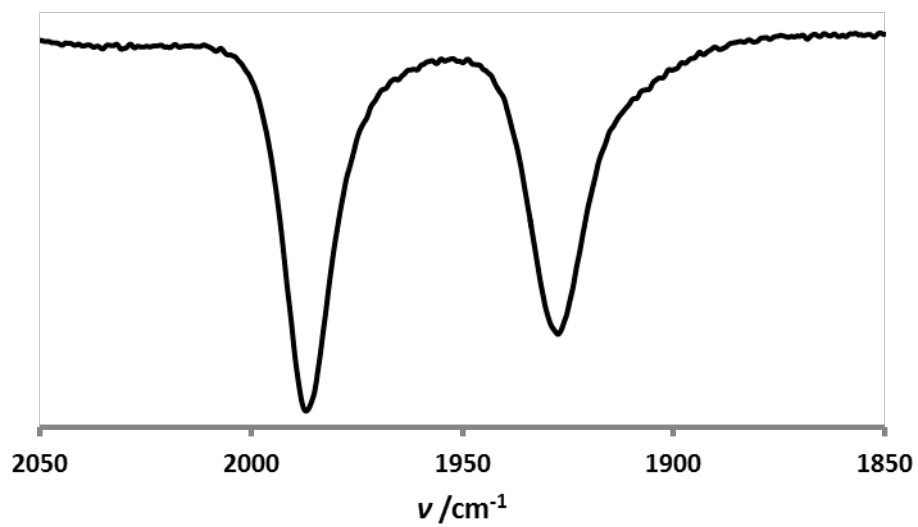

**Figure S45:** FT-IR spectrum ( $\nu_{\text{CO}}$  region,  $\text{CH}_2\text{Cl}_2$ ) of  $[\mathbf{4i}]\text{BF}_4$ .

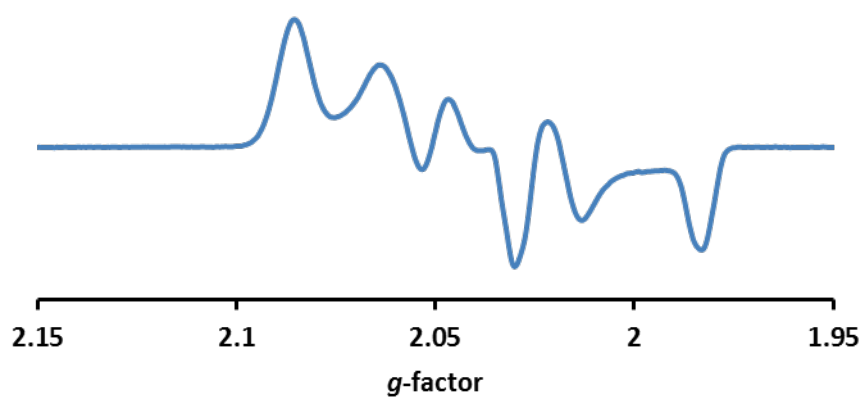

**Figure S46:** X-band EPR spectrum ( $\text{CH}_2\text{Cl}_2/\text{PhMe}$ , 110 K) of  $[\mathbf{4i}]\text{BF}_4$ .

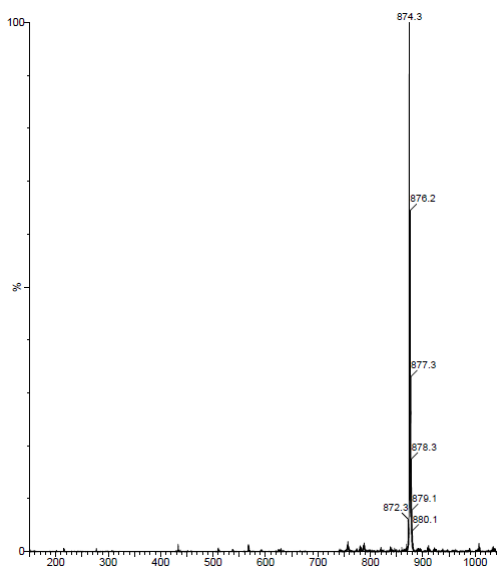

Figure S47: Positive ion ESI mass spectrum of [4j]BF<sub>4</sub>.

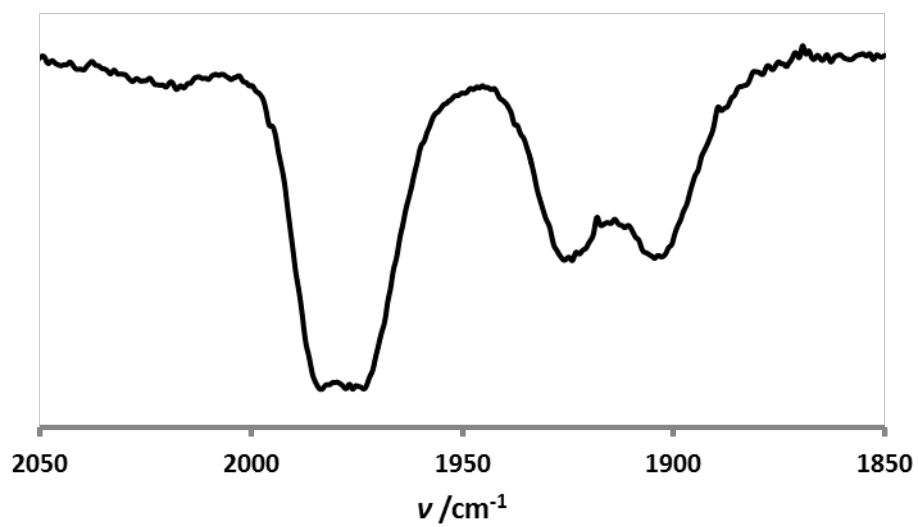

Figure S48: FT-IR spectrum ( $\nu_{\text{CO}}$  region, CH<sub>2</sub>Cl<sub>2</sub>) of [4j]BF<sub>4</sub>.



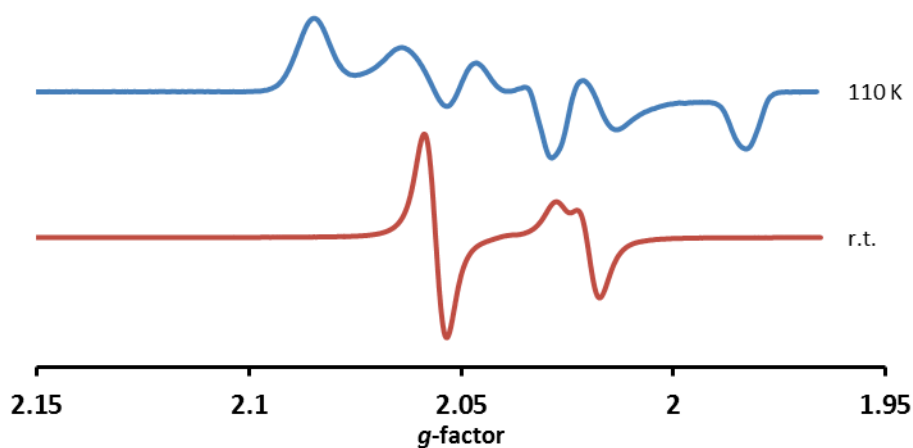

**Figure S49:** X-band EPR spectra (CH<sub>2</sub>Cl<sub>2</sub>/PhMe) of [4j]BF<sub>4</sub> collected at 110 K and room temperature.

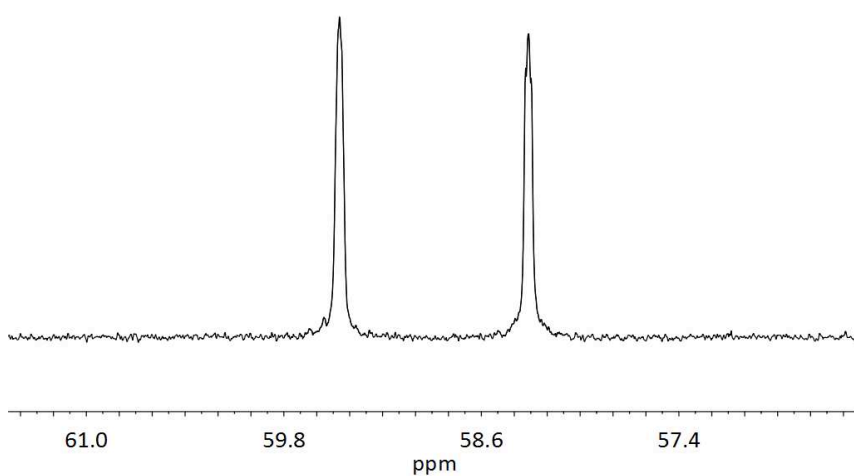

**Figure S50:** <sup>31</sup>P{<sup>1</sup>H} NMR spectrum (CD<sub>2</sub>Cl<sub>2</sub>, 202 MHz) of [5](BF<sub>4</sub>)<sub>2</sub>.

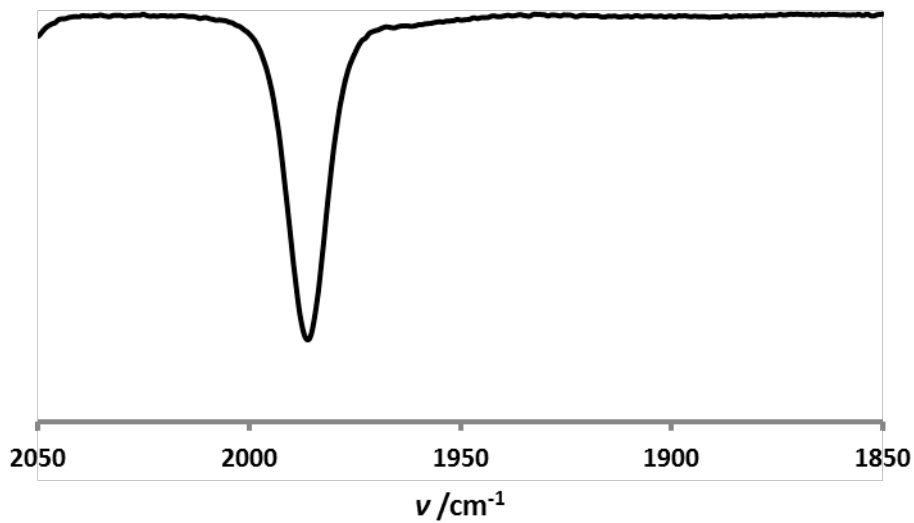

**Figure S51:** FT-IR spectrum (ν<sub>CO</sub> region, CH<sub>2</sub>Cl<sub>2</sub>) of [5](BF<sub>4</sub>)<sub>2</sub>.

**Table 1:** Calculated g-tensor principal values for complexes [1]<sup>+</sup>, [2]<sup>+</sup>, [3]<sup>+</sup>, [4a]<sup>+</sup> and [4e]<sup>+</sup> (superscripts <sup>a</sup> and <sup>b</sup> refer to flipamers of each complex, see Scheme 5).

| Complex            | SOMF(1X) TZVP                                                         |                           |                           | ZORA SO ROKS DZ                                                       |                           |                           |
|--------------------|-----------------------------------------------------------------------|---------------------------|---------------------------|-----------------------------------------------------------------------|---------------------------|---------------------------|
|                    | <i>g</i> <sub>1</sub> , <i>g</i> <sub>2</sub> , <i>g</i> <sub>3</sub> |                           |                           | <i>g</i> <sub>1</sub> , <i>g</i> <sub>2</sub> , <i>g</i> <sub>3</sub> |                           |                           |
|                    | BP                                                                    | B3LYP                     | PBE0                      | BP                                                                    | B3LYP                     | PBE0                      |
| [1] <sup>+a</sup>  | 2.033,<br>2.030,<br>2.012                                             | 2.044,<br>2.042,<br>2.005 | 2.047,<br>2.044,<br>2.004 | 2.041,<br>2.035,<br>2.020                                             | 2.052,<br>2.051,<br>2.006 | 2.057,<br>2.055,<br>2.004 |
| [1] <sup>+b</sup>  | 2.033,<br>2.027,<br>2.012                                             | 2.044,<br>2.037,<br>2.004 | 2.047,<br>2.038,<br>2.003 | 2.042,<br>2.030,<br>2.019                                             | 2.051,<br>2.047,<br>2.005 | 2.055,<br>2.051,<br>2.004 |
| [2] <sup>+</sup>   | 2.029,<br>2.026,<br>2.011                                             | 2.041,<br>2.038,<br>2.004 | 2.044,<br>2.040,<br>2.003 | 2.037,<br>2.029,<br>2.010                                             | 2.049,<br>2.044,<br>2.008 | 2.055,<br>2.048,<br>2.003 |
| [3] <sup>+a</sup>  | 2.033,<br>2.030,<br>2.016                                             | 2.045,<br>2.041,<br>2.006 | 2.048,<br>2.044,<br>2.005 | 2.043,<br>2.035,<br>2.026                                             | 2.052,<br>2.047,<br>2.010 | 2.057,<br>2.051,<br>2.008 |
| [3] <sup>+b</sup>  | 2.033,<br>2.027,<br>2.013                                             | 2.041,<br>2.038,<br>2.004 | 2.044,<br>2.040,<br>2.004 | 2.042,<br>2.029,<br>2.024                                             | 2.048,<br>2.047,<br>2.008 | 2.052,<br>2.051,<br>2.006 |
| [4a] <sup>+a</sup> | 2.038,<br>2.025,<br>2.014                                             | 2.061,<br>2.037,<br>2.010 | 2.065,<br>2.038,<br>2.011 | 2.045,<br>2.029,<br>2.018                                             | 2.060,<br>2.043,<br>2.006 | 2.065,<br>2.046,<br>2.004 |
| [4a] <sup>+b</sup> | 2.044,<br>2.026,<br>2.006                                             | 2.064,<br>2.047,<br>2.003 | 2.069,<br>2.048,<br>2.003 | 2.057,<br>2.024,<br>2.002                                             | 2.072,<br>2.057,<br>1.996 | 2.080,<br>2.065,<br>1.993 |
| [4e] <sup>+a</sup> | 2.045,<br>2.032,<br>2.007                                             | 2.067,<br>2.053,<br>2.004 | 2.072,<br>2.056,<br>2.004 | 2.059,<br>2.038,<br>2.006                                             | 2.074,<br>2.067,<br>1.997 | 2.082,<br>2.076,<br>1.994 |
| [4e] <sup>+b</sup> | 2.043,<br>2.026,<br>2.006                                             | 2.064,<br>2.047,<br>2.003 | 2.068,<br>2.048,<br>2.003 | 2.057,<br>2.024,<br>2.002                                             | 2.072,<br>2.057,<br>1.996 | 2.080,<br>2.065,<br>1.993 |

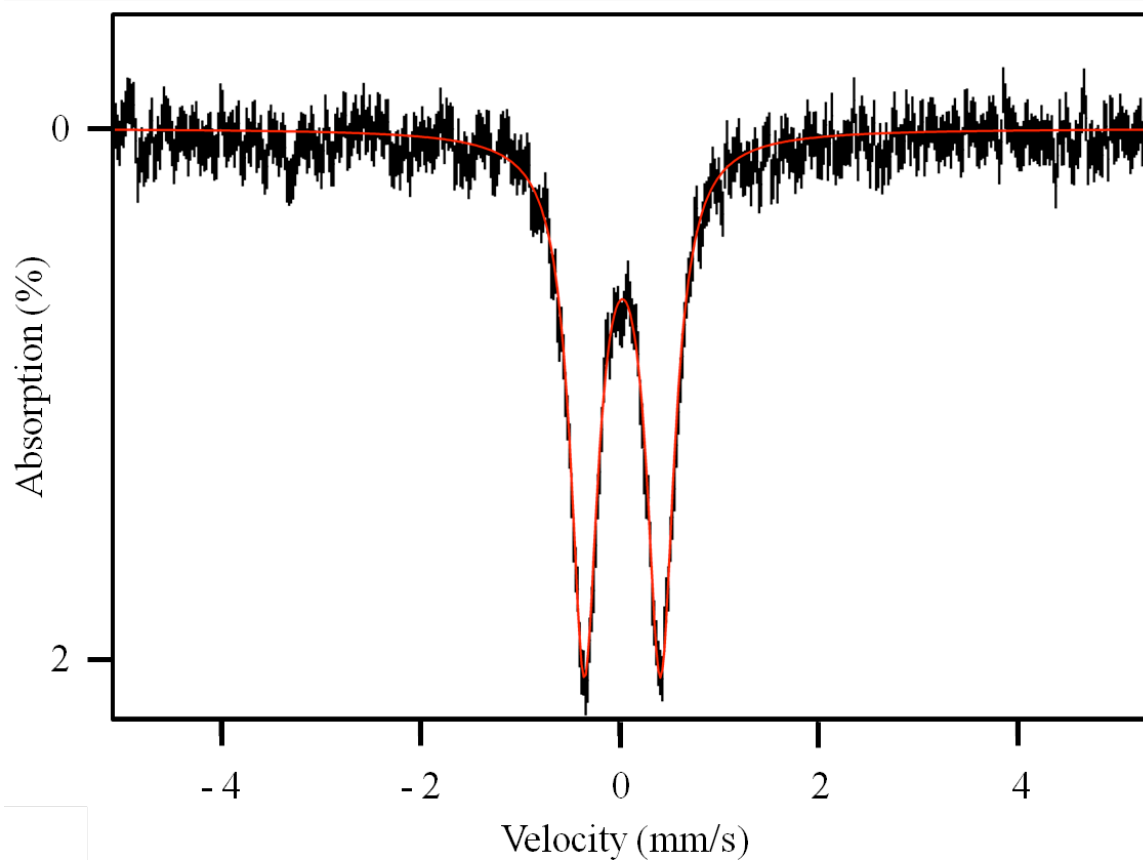

**Figure S52:** Mössbauer spectrum (5 K, 500 G) of  $(\text{CO})_3\text{Fe}(\text{pdt})\text{Fe}(\text{CO})_3$ , and simulated spectrum (solid trace).

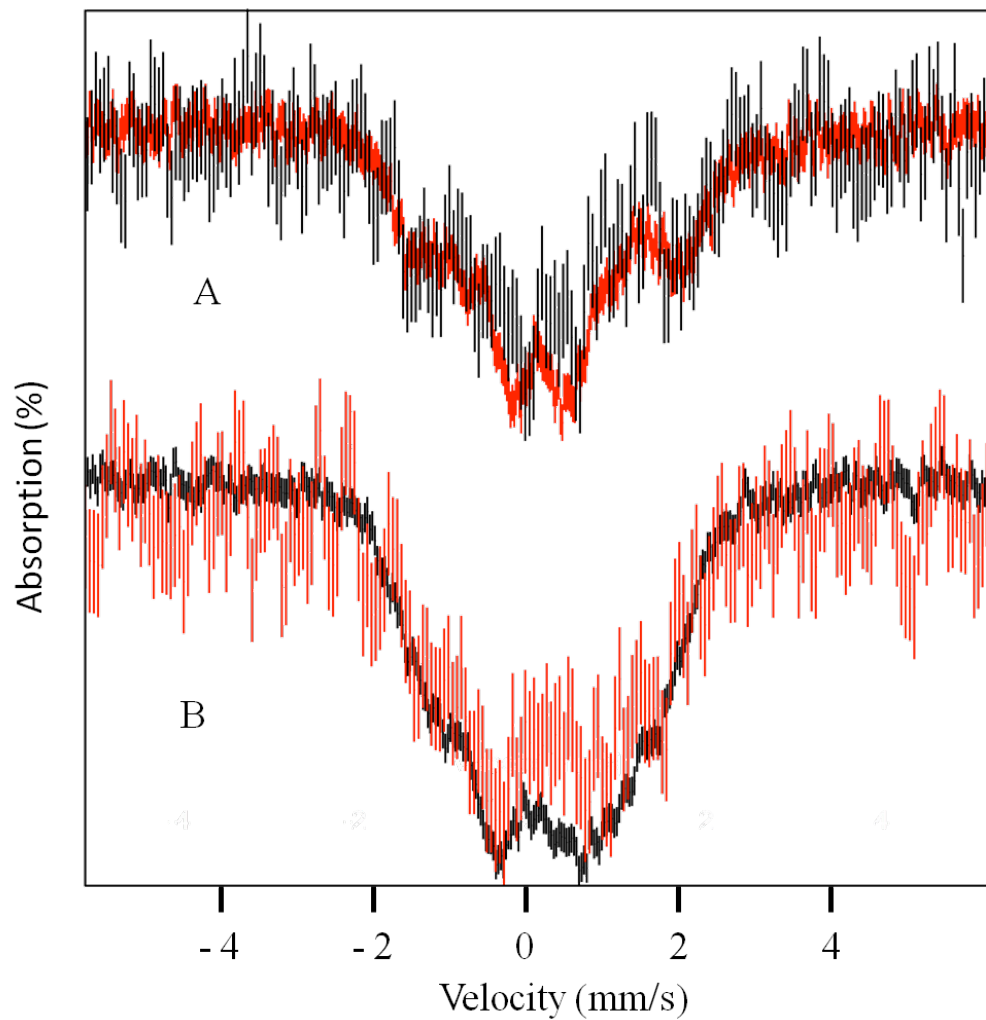

**Figure S53:** Mössbauer spectra of  $[4e]BF_4$ . A: 5 K, 500 G, 5 mM sample spectrum (black) overlaid on 40 mM sample spectrum (red). B: 4.2 K, 6 T Mössbauer data for  $[4e]BF_4$ , solid sample spectrum (black) overlaid on 40 mM sample spectrum (red).
